# Supplementary material
Source: MDPI journal article supplement (https://www.mdpi.com/2077-1312/11/9/1826)
Supplement: s1 [file s1]

Is the plant *Bolboschoenus maritimus* an adequate biomonitor for trace metals contamination in saltmarshes? A field study from the Óbidos Lagoon (Portugal).

## Supplementary material

Table S1 – Average precipitation data (mm) at the western coast of Portugal for each season under study, obtained from SNIRH (National Water Resources Information System from Portugal) during 2009 and 2010.

|                               | Spring<br>2009 | Summer<br>2009 | Autumn<br>2009 | Winter<br>2010 | Spring<br>2010 | Summer<br>2010 |
|-------------------------------|----------------|----------------|----------------|----------------|----------------|----------------|
| Average precipitation<br>(mm) | 41.1           | 23.0           | 50.2           | 143.5          | 78.0           | 7.6            |
